# Supplementary material for: Structural basis of redox-dependent substrate binding of protein disulfide isomerase
Source: PubMed Central journal article supplement (PMC4563560; doi:10.1038/srep13909), 2015-09-09
Supplement: srep13909-s1.pdf [file srep13909-s1.pdf]

## **Supplementary information**

### **Structural basis of redox-dependent substrate binding of protein disulfide isomerase**

Maho Yagi-Utsumi<sup>1,2</sup>, Tadashi Satoh<sup>2,3</sup>, and Koichi Kato<sup>1,2\*</sup>

<sup>1</sup>Okazaki Institute for Integrative Bioscience and Institute for Molecular Science, National Institutes of Natural Sciences, 5-1 Higashiyama, Myodaiji, Okazaki, Aichi 444-8787, Japan;

<sup>2</sup>Graduate School of Pharmaceutical Sciences, Nagoya City University, 3-1 Tanabe-dori, Mizuho-ku, Nagoya 467-8603, Japan; <sup>3</sup>JST, PRESTO, 3-1 Tanabe-dori, Mizuho-ku, Nagoya 467-8603, Japan

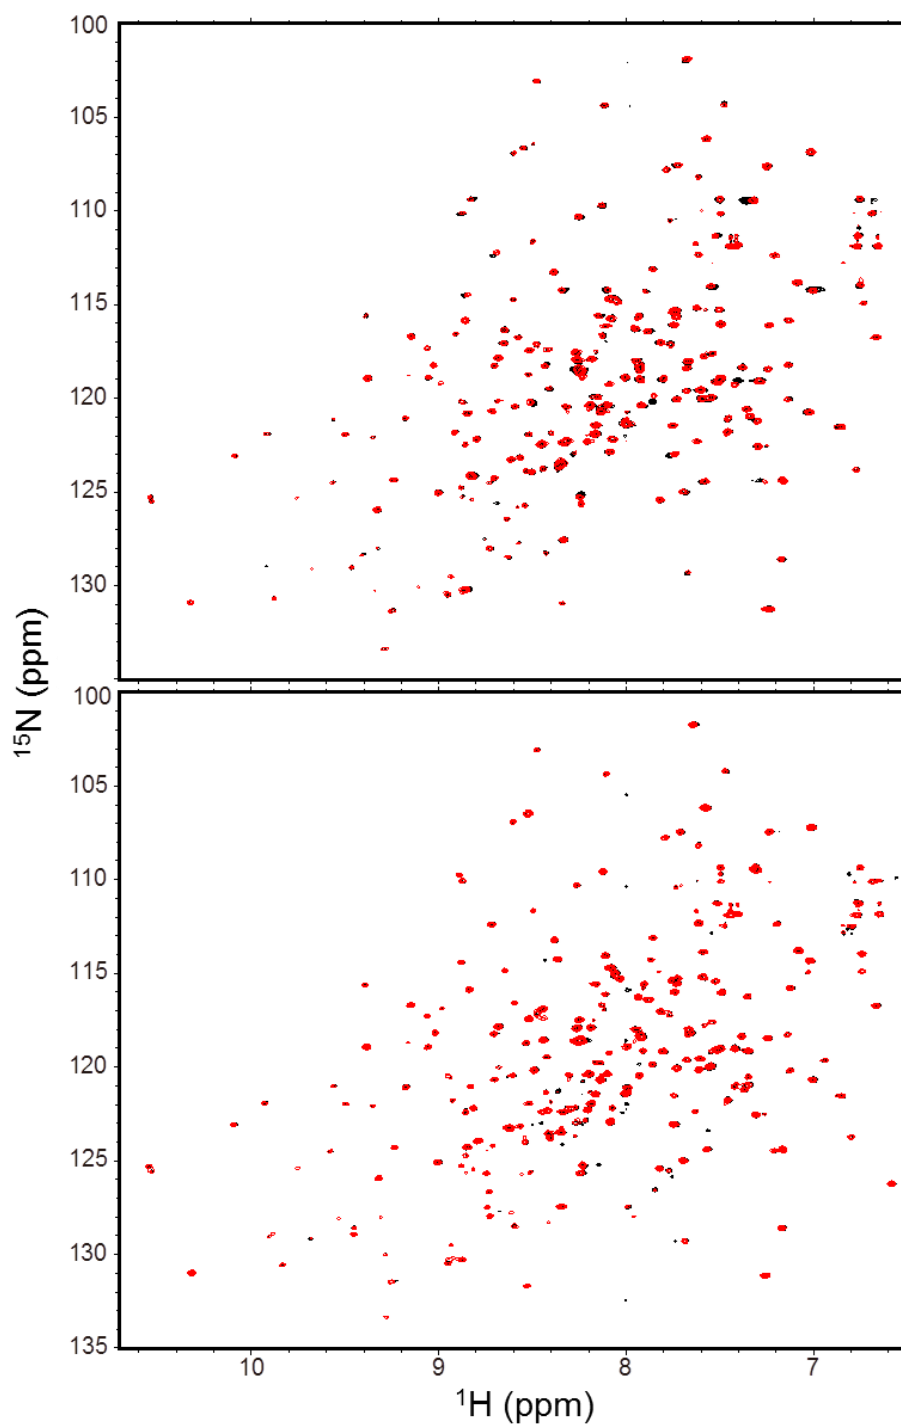

**Fig. S1. Redox-dependent interaction of the PDI  $b'$ - $a'$  domains with the  $\alpha\text{SN}$  peptide probed using NMR** Superposition of  $^1\text{H}$ - $^{15}\text{N}$  HSQC spectra of uniformly  $^{15}\text{N}$ -labeled oxidized (upper) and reduced (lower) PDI  $b'$ - $a'$  domains in the absence (black) and presence (red) of the  $\alpha\text{SN}$  peptide at a 1:4 molar ratio of PDI  $b'$ - $a'$  to the  $\alpha\text{SN}$  peptide.

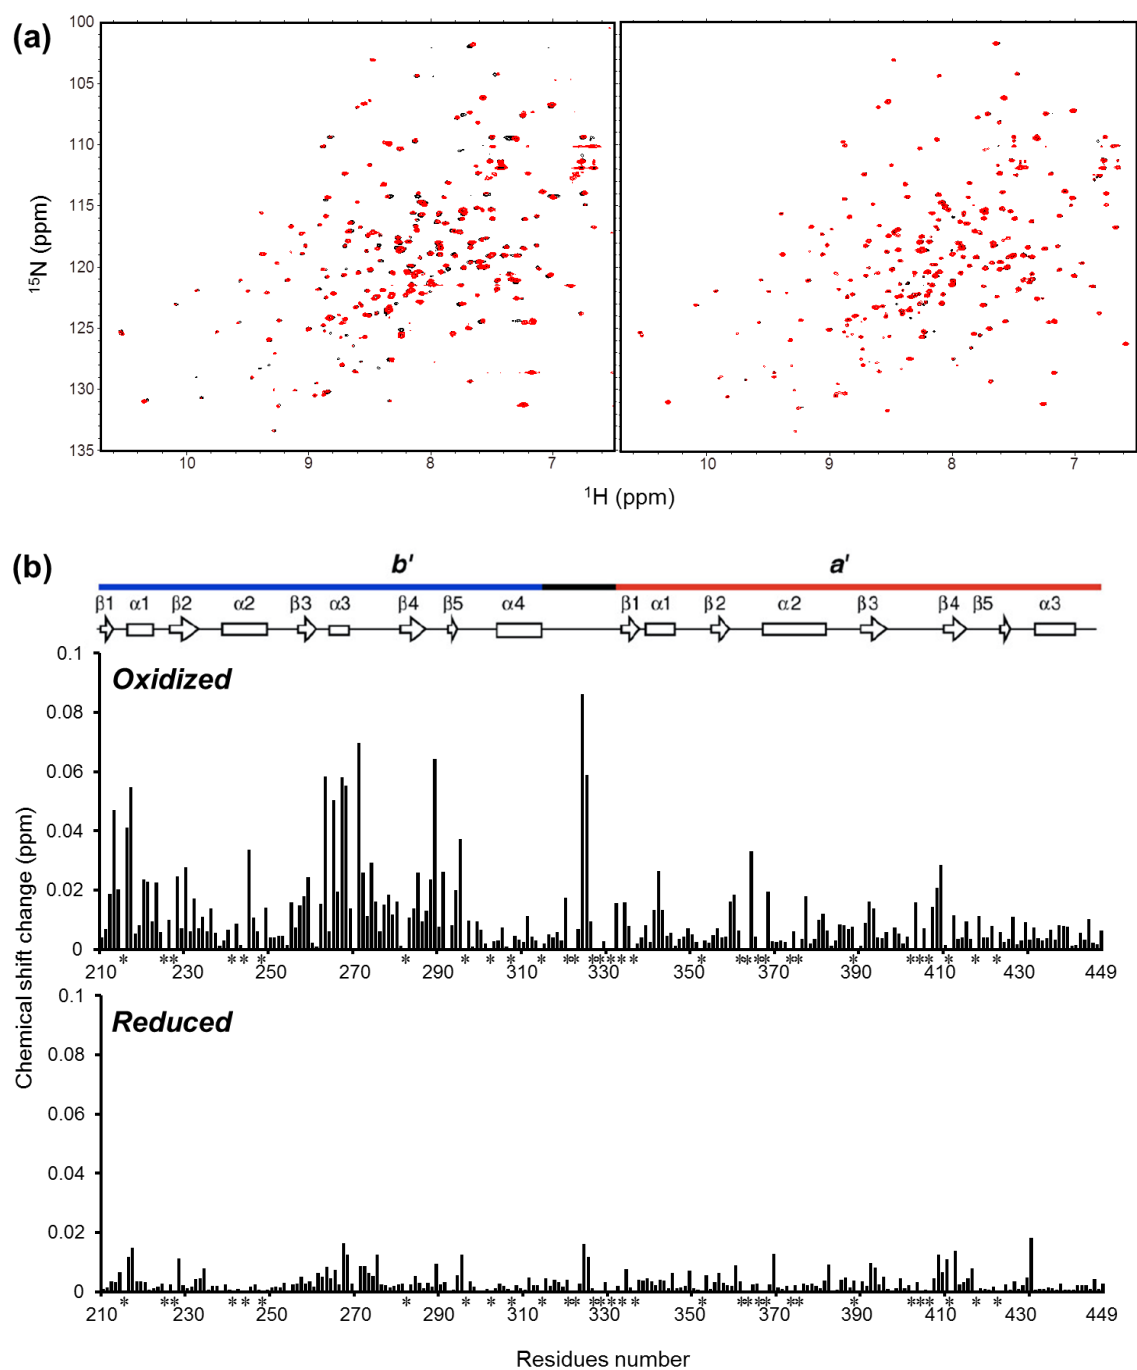

**Fig. S2. Redox-dependent interaction of the PDI  $b'$ - $a'$  domains with  $\alpha\text{SN}$  probed using NMR** (a) Superposition of  $^1\text{H}$ - $^{15}\text{N}$  HSQC spectra of uniformly  $^{15}\text{N}$ -labeled oxidized (left) and reduced (right) PDI  $b'$ - $a'$  domains in the absence (black) and presence (red) of  $\alpha\text{SN}$  at a 1:4 molar ratio of PDI  $b'$ - $a'$  domains to  $\alpha\text{SN}$ . (b) Plots of the chemical shift changes of the backbone amide peaks of the oxidized PDI  $b'$ - $a'$  domains (upper) or the reduced PDI  $b'$ - $a'$  domains (lower) upon interaction with  $\alpha\text{SN}$ .

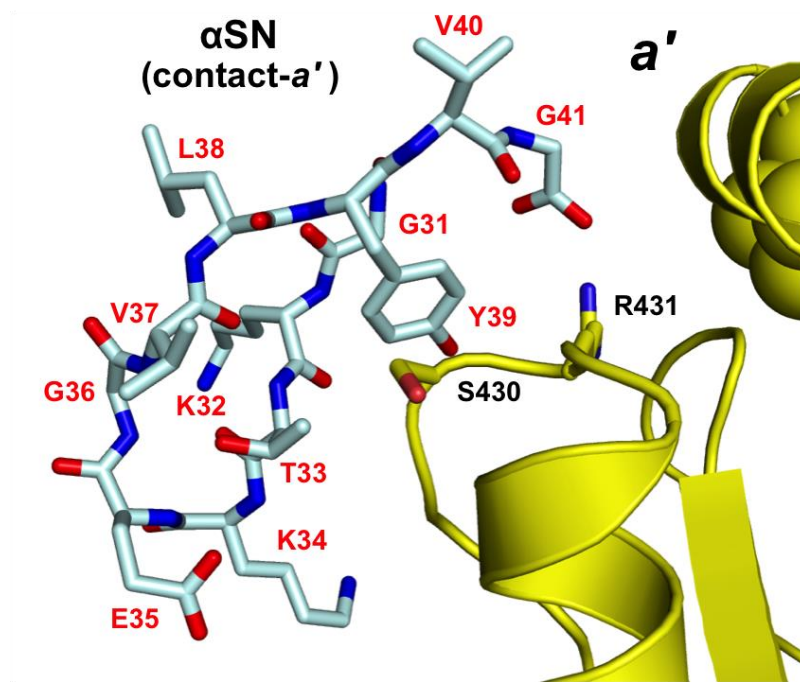

Fig. S3. Close-up view of the contact-a' interface between PDI (yellow) and the  $\alpha$ SN peptide (pale blue)

**Table S1. Data collection and refinement statistics for PDI *b'*-*a'* domains complexed with  $\alpha$ SN peptide.**

| <b>PDI <i>b'</i>-<i>a'</i>/<math>\alpha</math>SN</b>    |                                                       |
|---------------------------------------------------------|-------------------------------------------------------|
| <b>Crystallographic data</b>                            |                                                       |
| Space group                                             | <i>P</i> 2 <sub>1</sub> 2 <sub>1</sub> 2 <sub>1</sub> |
| Unit cell <i>a/b/c</i> (Å)                              | 58.3/62.8/68.4                                        |
| $\alpha/\beta/\gamma$ (°)                               | 90.0/90.0/90.0                                        |
| <b>Data processing statistics</b>                       |                                                       |
| Beam line                                               | SPring-8 BL44XU                                       |
| Wavelength (Å)                                          | 0.90000                                               |
| Resolution (Å)                                          | 50–1.60 (1.63–1.60)                                   |
| Total/unique reflections                                | 193982/33940                                          |
| Completeness (%)                                        | 95.6 (97.1)                                           |
| <i>R</i> <sub>merge</sub> (%)                           | 6.7 (38.9)                                            |
| <i>I</i> / $\sigma$ ( <i>I</i> )                        | 50.0 (10.3)                                           |
| <b>Refinement statistics</b>                            |                                                       |
| Resolution (Å)                                          | 20.00–1.60                                            |
| <i>R</i> <sub>work</sub> / <i>R</i> <sub>free</sub> (%) | 18.4/21.7                                             |
| R.m.s. deviations from ideal                            |                                                       |
| Bond lengths (Å)                                        | 0.012                                                 |
| Bond angles (°)                                         | 1.53                                                  |
| Ramachandran plot (%)                                   |                                                       |
| Most Favored                                            | 93.1                                                  |
| Additionally allowed                                    | 6.9                                                   |
| Generously allowed                                      | 0                                                     |
| Disallowed                                              | 0                                                     |
| Number of atoms                                         |                                                       |
| Protein atoms (A/B)                                     | 1879/81                                               |
| Water molecules                                         | 339                                                   |
| Average <i>B</i> -values (Å <sup>2</sup> )              |                                                       |
| Protein atoms (A/B)                                     | 26.2/28.9                                             |
| Water molecules                                         | 36.6                                                  |
